# Supplementary material for: Emissive Enhancement of the Singlet Oxygen Chemiluminescence Probe after Binding to Bovine Serum Albumin
Source: MDPI journal article supplement (doi:10.3390/molecules24132422), 2019-07-01
Supplement: s1 [file s1]

## SUPPLEMENTARY MATERIAL

Emissive enhancement of the Singlet Oxygen Chemiluminescence probe after binding to bovine serum albumin

Jon Miranda-Apodaca<sup>1</sup>, Nir Hananya<sup>2</sup>, Adrián Velázquez-Campoy<sup>3</sup>, Doron Shabat<sup>2</sup> and Juan B. Arellano<sup>1,\*</sup>

<sup>1</sup>Departamento de Estrés Abiótico, Instituto de Recursos Naturales y Agrobiología de Salamanca (IRNASA-CSIC), Salamanca 37008, Spain; [jon.miranda@irnasa.csic.es](mailto:jon.miranda@irnasa.csic.es) (J.M.A)

<sup>2</sup>School of Chemistry, Faculty of Exact Sciences, Tel Aviv University, Tel Aviv 69978, Israel; [hananyanir@gmail.com](mailto:hananyanir@gmail.com) (N.H.); [chdoron@post.tau.ac.il](mailto:chdoron@post.tau.ac.il) (D.S.)

<sup>3</sup>Institute of Biocomputation and Physics of Complex Systems (BIFI), Joint Units IQFR-CSIC-BIFI, and GBsC-CSIC-BIFI, Universidad de Zaragoza, Zaragoza 50018, Spain; Department of Biochemistry and Molecular and Cell Biology, Universidad de Zaragoza, Zaragoza 50009, Spain; Aragon Institute for Health Research (IIS-Aragon), Zaragoza 50009, Spain; Biomedical Research Networking Center in Digestive and Hepatic Diseases (CIBERehd), Madrid, Spain; Fundacion ARAID, Government of Aragon, Zaragoza 50018, Spain; [adrianvc@unizar.es](mailto:adrianvc@unizar.es) (A.V.-C.)

\*Correspondence: [juan.arellano@irnasa.csic.es](mailto:juan.arellano@irnasa.csic.es); Tel.: +34 923 219 606

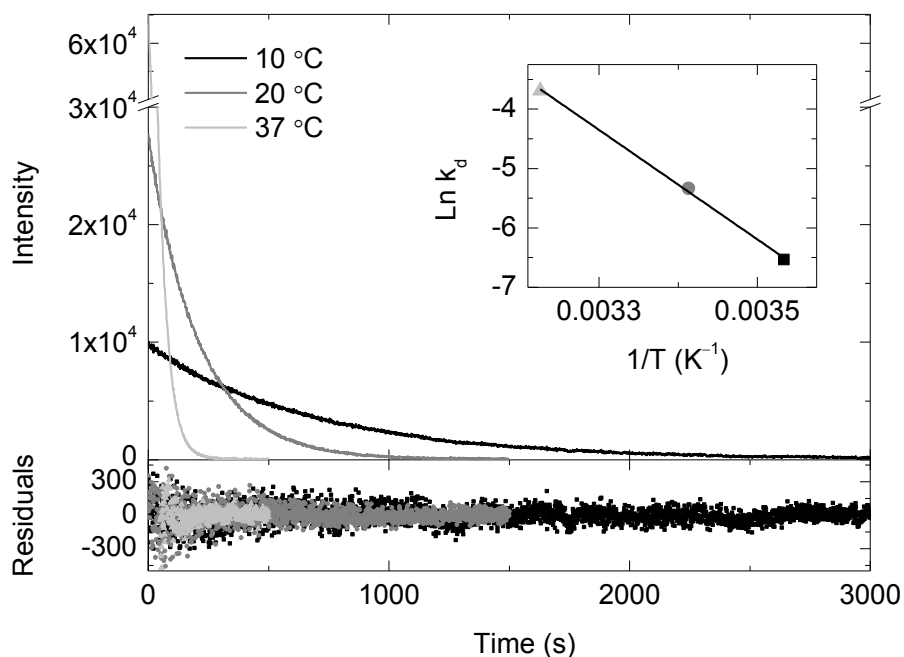

**Figure S1.** Time dependence of the chemiluminescence traces of the SOCL phenoxydioxetane derivative after the photooxygenation of SOCL with  $^1\text{O}_2$  in PBS pH 7.4 at three different temperatures. Before monitoring the chemiluminescence traces, the reaction mixtures were set in the oxygen electrode chamber in equilibrium with an atmosphere of 100%  $\text{O}_2$ . 2  $\mu\text{M}$  MB was present as  $^1\text{O}_2$  photosensitizer and 0.5 mM SOCL as  $^1\text{O}_2$  quencher. The reaction mixtures were illuminated with a red LED source with an intensity of 2  $\text{mE m}^{-2} \text{s}^{-1}$  for 2 min. Samples were taken from the oxygen electrode chamber after illumination and placed in a 1-cm fluorescence cuvette pre-incubated each time at the temperature used in the oxygen electrode chamber. The inset shows the dependence of the decomposition rate constant of the SOCL phenoxydioxetane derivative on temperature using the Arrhenius equation. The data was fitted to a mono-exponential equation,  $I_{515\text{nm}} = \alpha_0 + \alpha_1 \exp(-t/\tau_1)$ ; also shown are the corresponding residuals for each temperature experiment. The standard error for the decay rate constants is  $< 5\%$ .
